# Supplementary material for: Association of sarcopenia with survival in advanced NSCLC patients receiving concurrent immunotherapy and chemotherapy
Source: PubMed Central journal article supplement (PMC9539742; doi:10.3389/fonc.2022.986236), 2022-09-23

**Suppl. Figure 1**

A

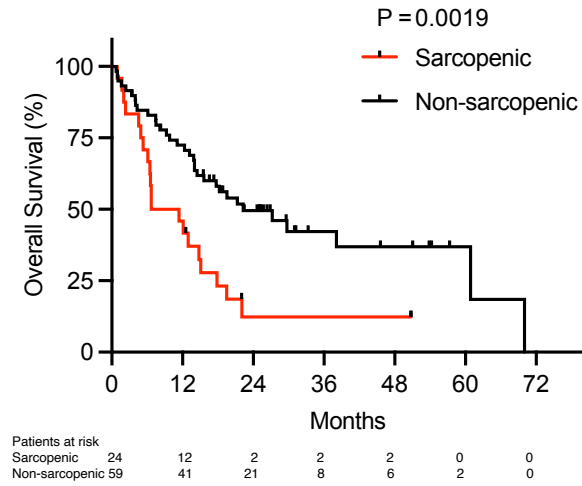

**Suppl. Figure 2**

A

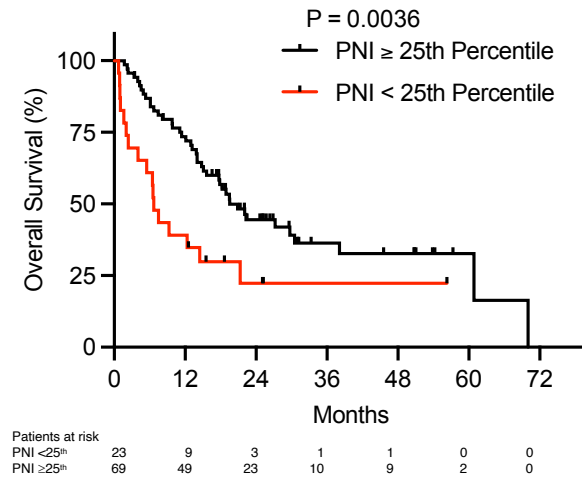

B

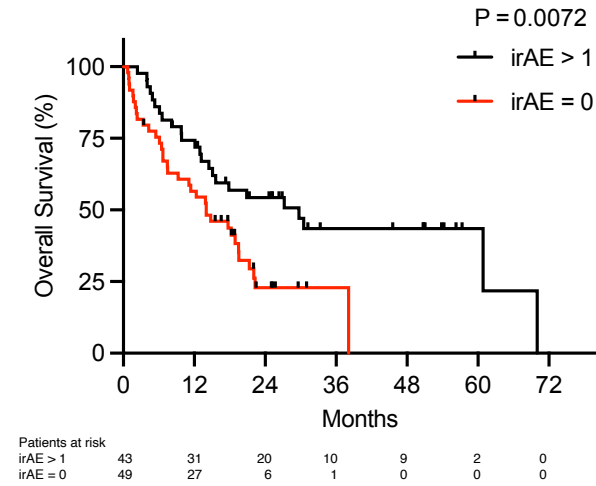

Supplement: Image_1.pdf [file Image_1.pdf]
