# Supplementary material for: Association of sarcopenia with survival in advanced NSCLC patients receiving concurrent immunotherapy and chemotherapy
Source: PubMed Central journal article supplement (PMC9539742; doi:10.3389/fonc.2022.986236), 2022-09-23
Supplement: Table_1.pdf [file Table_1.pdf]

**Supplementary Table 1: Selected studies evaluating the impact of sarcopenia determined by the psoas muscle index on prognosis of non-small cell lung cancer patients**

| Author                       | Sarcopenia definition                                                                                                                                                                                                                | Patient population                                                                                    | Endpoints                                                                         |
|------------------------------|--------------------------------------------------------------------------------------------------------------------------------------------------------------------------------------------------------------------------------------|-------------------------------------------------------------------------------------------------------|-----------------------------------------------------------------------------------|
| Tsakagoshi et al. (2020) (1) | Cross sectional area of the bilateral psoas muscles at the L3 level on CT scan divided by the height squared. Cut-off values were <3.92 cm <sup>2</sup> /m <sup>2</sup> for women and <6.36 cm <sup>2</sup> /m <sup>2</sup> for men. | 30 patients with stage IIIB/IV NSCLC or recurrent NSCLC receiving nivolumab.                          | Progression free and overall survival                                             |
| Takada et al. (2020) (2)     | <i>Skeletal muscle area</i> at the L3 level on CT scan divided by the height squared. Cut-off values were <21.73 cm <sup>2</sup> /m <sup>2</sup> for women and <25.63 cm <sup>2</sup> /m <sup>2</sup> for men.                       | 103 patients with stage IIIB/IV NSCLC or recurrent NSCLC receiving either nivolumab or pembrolizumab. | Progression free and overall survival                                             |
| Shiroyama et al. (2019) (3)  | Cross sectional area of the bilateral psoas muscles at the L3 level on CT scan divided by the height squared. Cut-off values were <3.92 cm <sup>2</sup> /m <sup>2</sup> for women and <6.36 cm <sup>2</sup> /m <sup>2</sup> for men. | 42 patients with advanced NSCLC receiving either nivolumab or pembrolizumab.                          | Progression free survival                                                         |
| Takahashi et al. (2021) (4)  | Cross sectional area of the bilateral psoas muscles at the L3 level on CT scan. Cut-off values were 460.55 mm <sup>2</sup> for women and 491.53 mm <sup>2</sup> for men.                                                             | 315 patients with stage I NSCLC who had undergone lobectomy with systematic nodal dissection.         | Postoperative complications, recurrence-free survival and 5-year overall survival |
| Nakamura et. al. (2018) (5)  | Cross sectional area of the bilateral psoas muscles at the L3 level on CT scan divided by the height squared. Cut-off values were <3.92 cm <sup>2</sup> /m <sup>2</sup> for women and <6.36 cm <sup>2</sup> /m <sup>2</sup> for men. | 328 patients with stage I-III NSCLC who had undergone surgery                                         | Overall survival                                                                  |

## References

1. Tsukagoshi M, Yokobori T, Yajima T, Maeno T, Shimizu K, Mogi A, et al. Skeletal muscle mass predicts the outcome of nivolumab treatment for non-small cell lung cancer. *Medicine (Baltimore)*. 2020;99(7):e19059.
2. Takada K, Yoneshima Y, Tanaka K, Okamoto I, Shimokawa M, Wakasu S, et al. Clinical impact of skeletal muscle area in patients with non-small cell lung cancer treated with anti-PD-1 inhibitors. *J Cancer Res Clin Oncol*. 2020;146(5):1217-25.
3. Shiroyama T, Nagatomo I, Koyama S, Hirata H, Nishida S, Miyake K, et al. Impact of sarcopenia in patients with advanced non-small cell lung cancer treated with PD-1 inhibitors: A preliminary retrospective study. *Sci Rep*. 2019;9(1):2447.
4. Takahashi Y, Suzuki S, Hamada K, Nakada T, Oya Y, Sakakura N, et al. Sarcopenia is poor risk for unfavorable short- and long-term outcomes in stage I non-small cell lung cancer. *Ann Transl Med*. 2021;9(4):325.
5. Nakamura R, Inage Y, Tobita R, Yoneyama S, Numata T, Ota K, et al. Sarcopenia in Resected NSCLC: Effect on Postoperative Outcomes. *Journal of Thoracic Oncology*. 2018;13(7):895-903.
